# Supplementary material for: Composition, size distribution, optical properties, and radiative effects of laboratory-resuspended PM 10 from geological dust of the Rome area, by electron microscopy and radiative transfer modelling
Source: Copernicus journal article supplement (doi:10.5194/acp-15-13177-2015), 2015-11-27
Supplement: Supplementary file 1 [file acp-15-13177-2015-supplement.pdf]

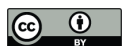

*Supplement of*

**Composition, size distribution, optical properties, and radiative effects of laboratory-resuspended PM<sub>10</sub> from geological dust of the Rome area, by electron microscopy and radiative transfer modelling**

**A. Pietrodangelo et al.**

*Correspondence to:* A. Pietrodangelo (pietrodangelo@iia.cnr.it)

The copyright of individual parts of the supplement might differ from the CC-BY 3.0 licence.

# 1 **Supplementary materials**

## 2 **Section S1**

### 3 **Internal standard approach to quantification of particle elemental composition** 4 **from SEM XEDS microanalysis**

5

6 First, high-count spectra of particles analyzed manually in the dust sample matrix (as  
7 described in Sect. 2.2) were quantified by the standard-based routine available from EDAX  
8 control v. 3.3 package (Newbury and Ritchie, 2013); to this aim, the pure minerals available  
9 from EDAX Library have been used as standards. Long acquisition time and high counts of  
10 these spectra are expected to minimize the statistical error of quantification (Goldstein et al.,  
11 1986). From the EDAX quantification routine, the element Z (atomic number), A (absorption)  
12 and F (fluorescence) correction factors, related to the influence of the particulate matrix on X-  
13 ray losses of individual particles, are obtained for each analyzed particle of a sample.

14 Element ZAF mean values, differentiated by dust sample, were then obtained by averaging,  
15 within each sample, ZAF values of all analyzed particles. Finally, the sample-specific mean  
16 ZAF values were used in the quantification of particle spectra obtained by automated  
17 microanalysis. The conventional standard-based ZAF-corrected Castaing's method was used  
18 also in this case; however, the standard element concentration and ZAF were those of the  
19 manually-analyzed particles. By this procedure, indeed, manually analyzed particles could be  
20 assumed as internal particle standard, on a sample-specific base. The reliability of  
21 quantification of manually analyzed particles, by Castaing's first approximation approach,  
22 was evaluated in terms of accuracy with respect to mineral standards available from the  
23 EDAX Library. Results are discussed in Sect. 3.1.

24 Particles showing total percent weight (%wt) of the particle that could be identified below 50  
25 (including oxygen estimated by element oxides) were not further considered in the rest of the  
26 study.

27 Reference XEDS spectra and elemental composition of pure minerals, to be used for particle  
28 allocation, were obtained either from the EDAX Library (biotite, clorite, calcite, diopside,  
29 kaersutite, olivine, plagioclase and quartz) or by the RRUFF project (Downs, 2006) and  
30 GEOROC (Sarbas and Nohl, 2008) open-source databases, available on the web. Minerals  
31 collected from Central Italy were preferred where possible.

1 Spectral matching was performed by the chi-square test for spectral goodness of fit included  
2 in the Library matching v.3.3 application (EDAX Inc., 2000). In cases where spectral  
3 matching couldnøt be performed, allocation of particles to mineral species was obtained on the  
4 basis of the best fit of dust particle %wt element composition versus the composition of pure  
5 minerals, by single linear regression analysis (SLR). The reliability of the internal standard  
6 approach has been evaluated by assessing the consistency of the allocation to mineral species  
7 (which directly depends on results of quantification by internal standard approach) with XRD  
8 analysis.

9

10

11

12

13

14

15

16

17

18

19

20

21

22

23

24

25

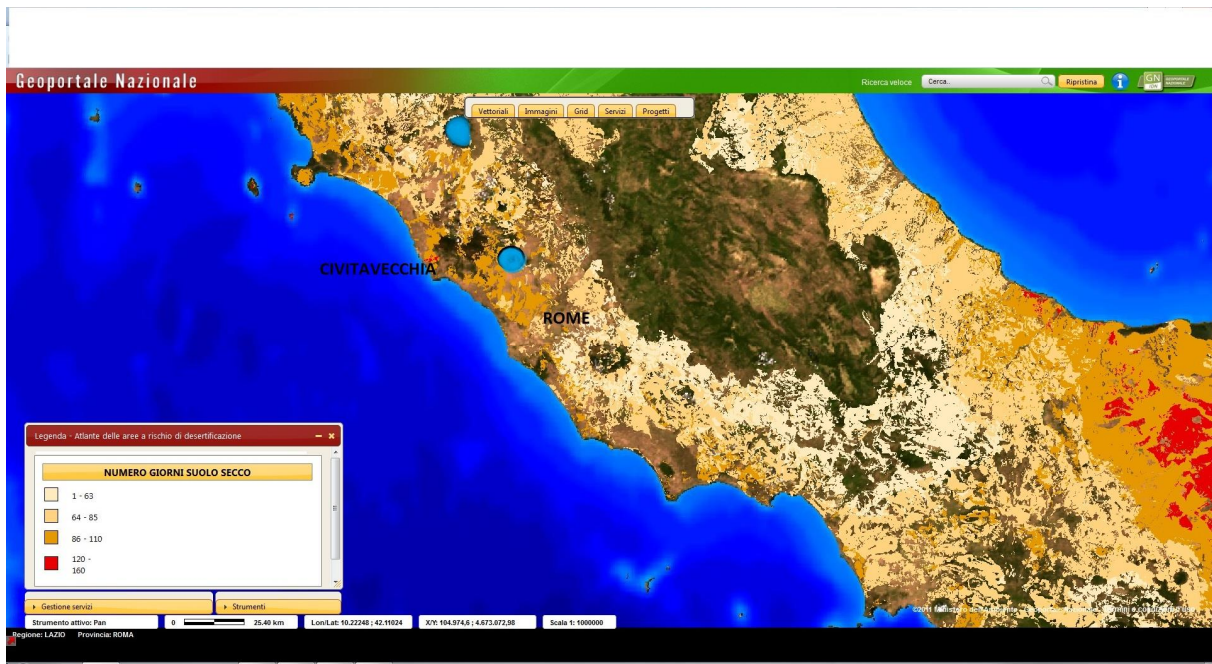

1  
2  
3  
4  
5  
6  
7

Figure S1. Map of the annual average number of dry soil days in the area of study of this work (Geoportale Nazionale MATTM, 2011). Highest number of dry soil days (86 ÷ 110) is observed in the northern zone of the study area of this work.

1

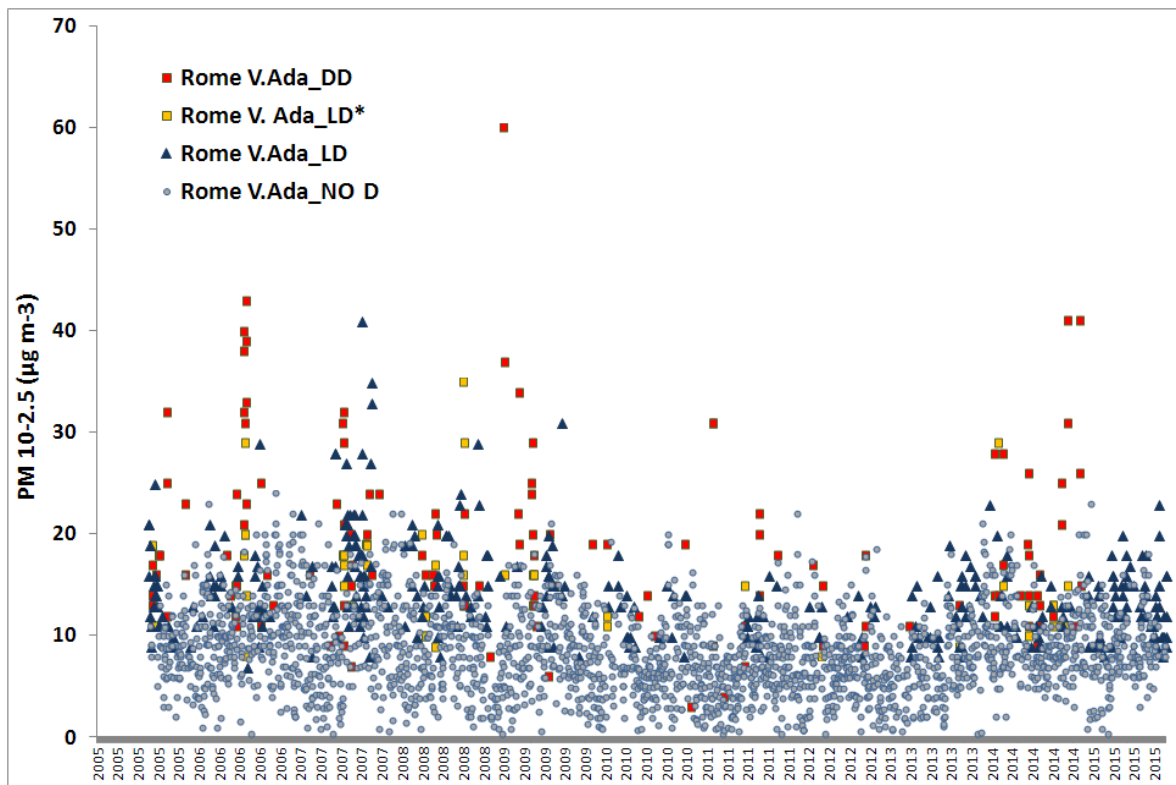

2

3

4 Figure S2. Daily coarse PM at Villa Ada site (urban background) in Rome, along the 2005 ó  
5 2015 period (ARPA Lazio, 2015). Data in the plot refer to days of: desert dust intrusion at-  
6 ground (DD), local crustal contribution occurring next a DD intrusion event (LD\*), local  
7 crustal contribution distant from DD events (LD) and low crustal contribution (NO D).

1

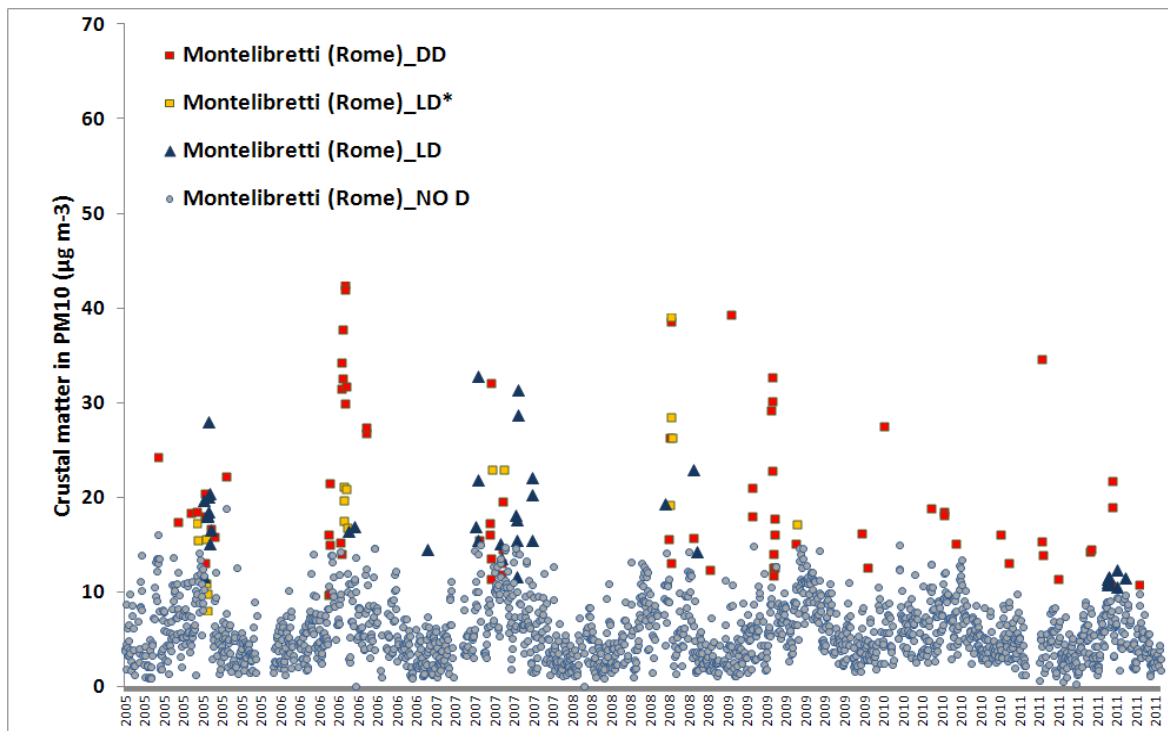

2

3

4 Figure S3. Daily crustal matter in the PM10 at Montelibretti (EMEP site), in Rome skirts,  
5 along the 2005 ó 2011 period (Perrino et al., 2015). Data in the plot refer to days of: desert  
6 dust intrusion at-ground (DD), local crustal contribution occurring next a DD intrusion event  
7 (LD\*), local crustal contribution distant from DD events (LD) and low crustal contribution  
8 (NO D).

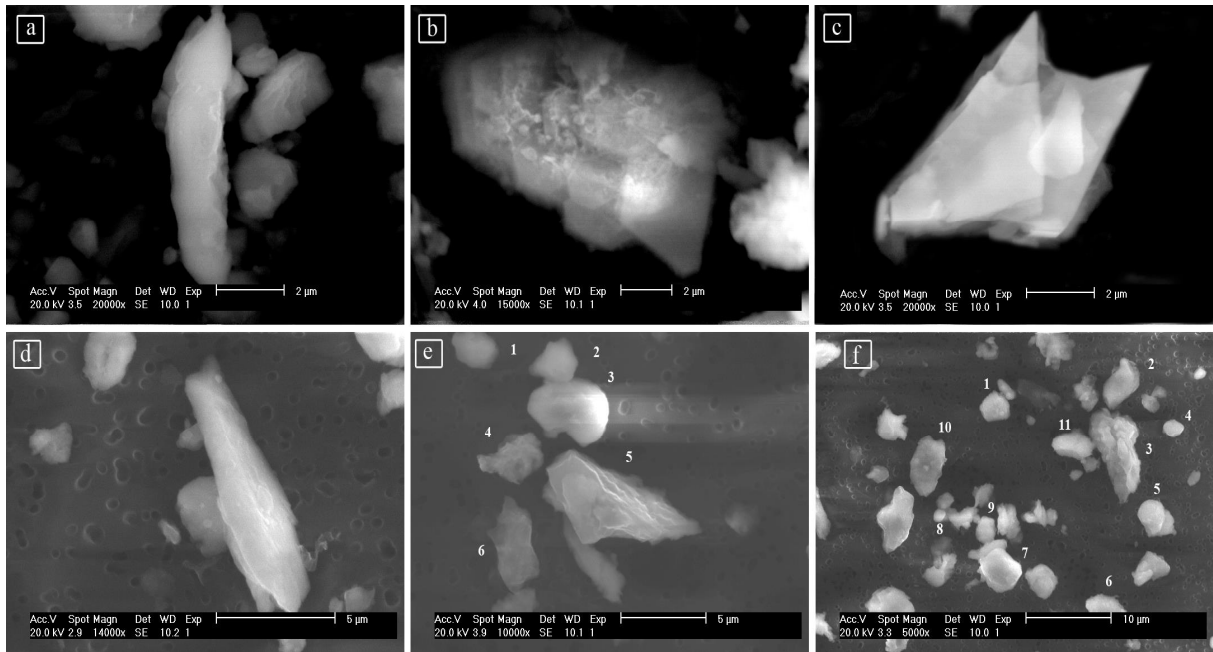

1  
2  
3  
4  
5  
6  
7  
8

Figure S4. SEM micrographs of mineral particles identified in the study area.

Instrumental conditions are reported on each micrograph. a: Diopside; b: Mica; c: Montmorillonite; d: Muscovite; e: Calcite (particle #: 1, 2, 3), Talc, K-feldspar and Quartz (respectively, particle #: 4, 5, 6); f: Calcite (particle #: 1, 6, 7, 9), Quartz (particle #: 3, 5, 8, 10), Chabazite (particle #: 4, 11), Muscovite (particle # 2).

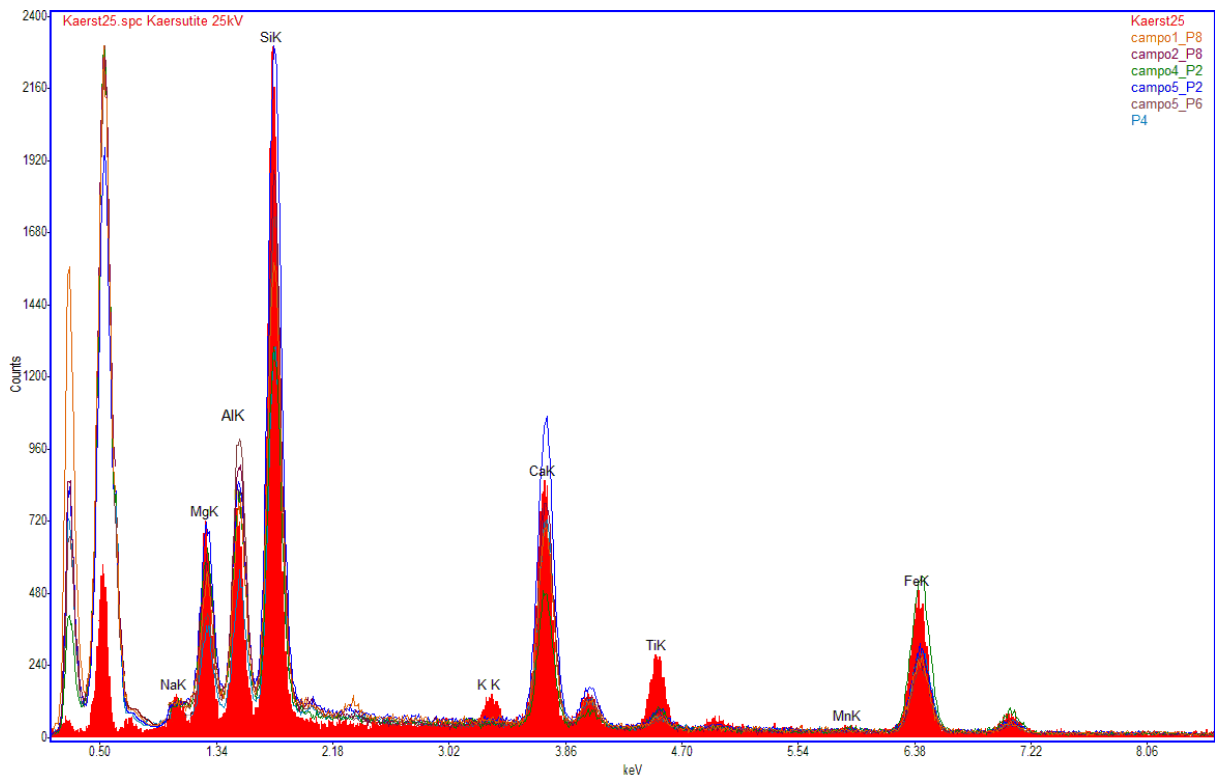

1  
2  
3  
4  
5

Figure S5. Overlap of high-count XEDS spectra of particles classified as Kaersutite, with respect to the EDAX spectrum of the bulk mineral standard.



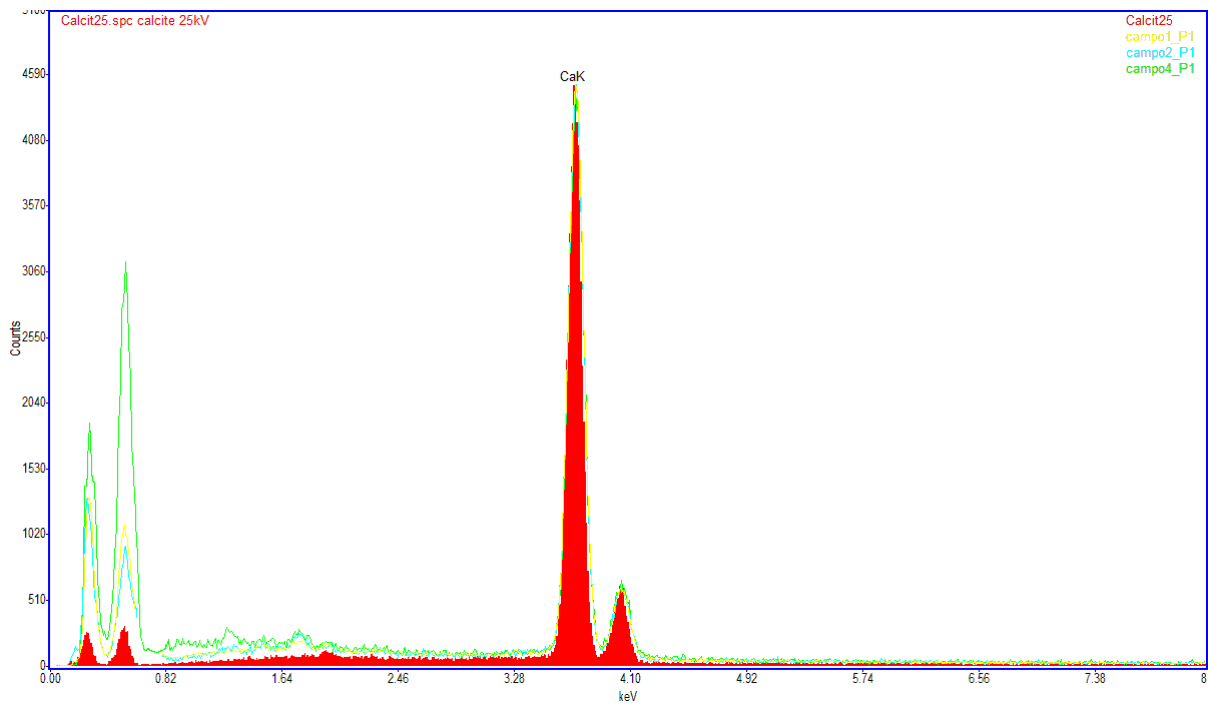

1

2

3 Figure S6. Overlap of high-count XEDS spectra of particles classified as Calcite, with respect  
4 to the EDAX spectrum of the bulk mineral standard.

5

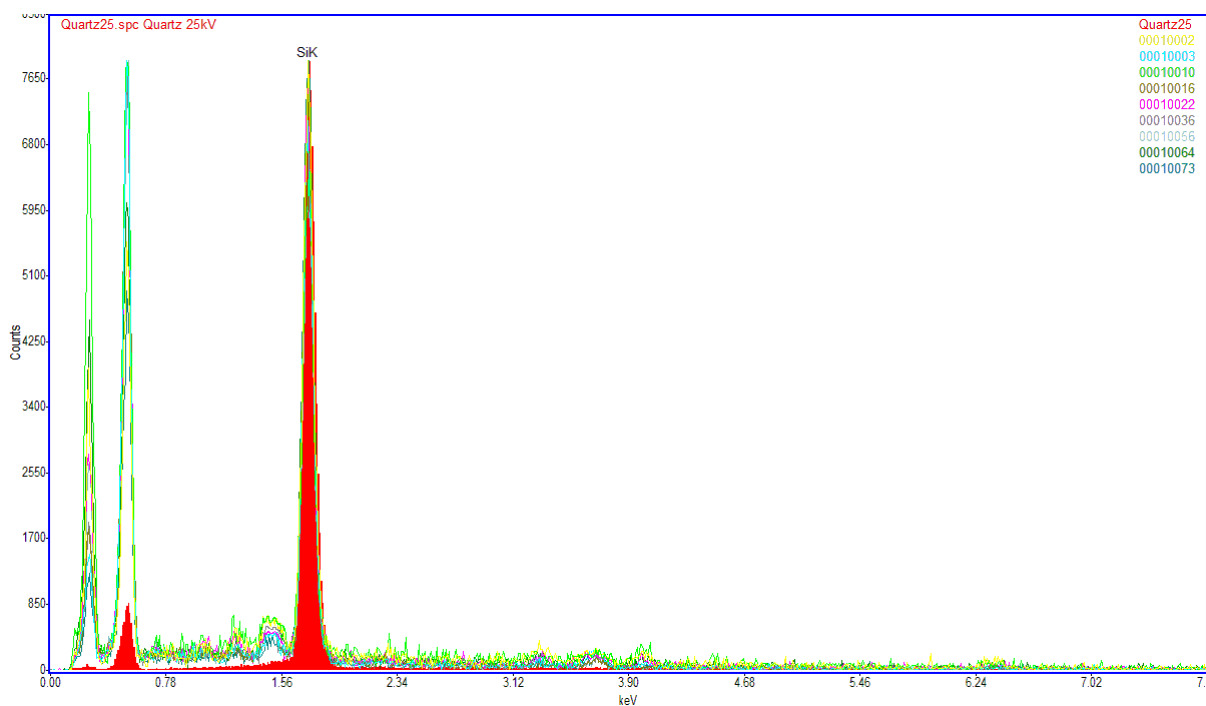

1  
2  
3 Figure S7. Overlap of high-count XEDS spectra of particles classified as Quartz, with respect  
4 to the EDAX spectrum of the bulk mineral standard.

5  
6 References

7 ARPA Lazio, Centro Regionale della Qualità dell'Aria, available at:  
8 <http://www.arpalazio.net/main/aria/sci/basedati/chimici/chimici.php> (last access: 15/10/2015),  
9 2015.

10 Downs R. T: The RRUFF Project: an integrated study of the chemistry, crystallography,  
11 Raman and infrared spectroscopy of minerals, 19th General Meeting of the International  
12 Mineralogical Association in Kobe, Japan, July 23-28, O03-13, 2006.

13 Geoportale Nazionale: available at <http://www.pcn.minambiente.it/GN/> (last access: 31  
14 March 2015), MATTMó Ministero dell'Ambiente e della Tutela del Territorio e del Mare,  
15 Italy, 2011.

16 Goldstein, J. I., Williams, D. B., Cliff, G.: Quantitative x-ray analysis, in: Principles of  
17 Analytical Electron Microscopy: Joy, D. C., Romig Jr., A. D., and Goldstein, J. I. Editors,  
18 chapter 5, Springer U.S., ISBN: 978-1-4899-2039-3, 1986.

19 Newbury, D. E. and Ritchie, N. W. M.: Is Scanning Electron Microscopy/Energy Dispersive  
20 X-Ray Spectrometry (SEM/EDS) quantitative? Scanning, 35, 1416168, 2013.

1 Perrino, C., Catrambone, M., Dalla Torre, S., Rantica, E., Sargolini, T.: *unpublished data*,  
2 2015.

3 Sarbas, B. and Nohl, U.: The GEOROC database as part of a growing geoinformatics  
4 network, in: Geoinformatics 2008ô Data to Knowledge, Proceedings, U.S. Geological Survey  
5 Scientific Investigations Report 2008-5172: Brady, S. R., Sinha, A. K., and Gundersen, L. C.  
6 Editors, 42-43, available at: <http://georoc.mpch-mainz.gwdg.de/georoc/Start.asp> (last access:  
7 31/03/2015), 2008.
